# Supplementary material for: Highest Vaccine Uptake after School-Based Delivery - A County-Level Evaluation of the Implementation Strategies for HPV Catch-Up Vaccination in Sweden
Source: PubMed Central journal article supplement (PMC4790890; doi:10.1371/journal.pone.0149857), 2016-03-14
Supplement: pone.0149857.s001.pdf [file pone.0149857.s001.pdf]

Supporting information:

Highest vaccine uptake after school-based delivery - a county-level evaluation of the implementation strategies for HPV catch-up vaccination in Sweden

Moa Rehn, Ingrid Uhnoo, Sharon Kühlmann-Berenzon, Anders Wallensten, Pär Sparén, Eva Netterlid

**S1 Table. Implementation strategies by county.** Information channels used to reach the catch-up group to inform about HPV vaccination and where to receive the vaccine, and vaccination settings, by county, Sweden 2012-2014

| County          | Information channels |                 |                |                |                          |                    |               |              |                            |                                | Vaccination settings |              |                          |                            |
|-----------------|----------------------|-----------------|----------------|----------------|--------------------------|--------------------|---------------|--------------|----------------------------|--------------------------------|----------------------|--------------|--------------------------|----------------------------|
|                 | Targeted information | Smart phone app | County website | Media coverage | School-based information | Letter/ invitation | Advertisement | Social media | Cinema commercial/ YouTube | On-line health care consulting | All schools          | Some schools | Other health care centre | Primary health care centre |
| Blekinge        |                      |                 |                |                |                          | X                  | X             |              |                            |                                |                      |              |                          | X                          |
| Dalarna         |                      |                 |                | X              |                          | X                  | X             |              |                            |                                |                      | X            |                          | X                          |
| Gotland         |                      |                 |                |                |                          | X                  | X             |              |                            |                                |                      |              |                          | X                          |
| Gävleborg       |                      |                 | X              | X              |                          | X                  | X             |              |                            |                                |                      |              |                          | X                          |
| Halland         |                      |                 | X              | X              |                          | X                  | X             | X            |                            | X                              |                      | X            |                          | X                          |
| Jämtland        |                      |                 | X              |                | X                        |                    | X             |              |                            |                                | X                    |              |                          | X                          |
| Jönköping       |                      |                 | X              |                | X                        | X                  | X             | X            | X                          |                                | X                    |              |                          | X                          |
| Kalmar          |                      |                 |                |                |                          | X                  |               |              |                            |                                |                      |              |                          | X                          |
| Kronoberg       |                      |                 |                | X              |                          | X                  |               |              |                            |                                |                      |              |                          | X                          |
| Norrbottn       |                      |                 |                | X              | X                        | X                  | X             | X            |                            |                                |                      |              |                          | X                          |
| Skåne           |                      |                 | X              | X              | X                        | X                  | X             | X            | X                          | X                              |                      | X            | X                        | X                          |
| Stockholm       |                      |                 |                |                | X                        | X                  | X             | X            |                            |                                |                      | X            |                          | X                          |
| Södermanland    |                      | X               | X              |                | X                        | X                  | X             |              | X                          |                                |                      |              |                          | X                          |
| Uppsala         |                      | X               | X              | X              |                          | X                  | X             |              | X                          |                                |                      |              | X                        | X                          |
| Värmland        |                      |                 |                |                | X                        | X                  |               |              |                            |                                | X                    |              |                          | X                          |
| Västerbotten    | X                    |                 | X              |                |                          | X                  | X             |              | X                          |                                |                      | X            |                          | X                          |
| Västernorrland  |                      |                 |                |                | X                        |                    |               |              |                            |                                | X                    |              |                          | X                          |
| Västmanland     |                      |                 |                |                | X                        | X                  | X             |              |                            |                                |                      | X            |                          | X                          |
| Västra Götaland | X                    |                 |                |                |                          | X                  | X             | X            | X                          |                                |                      | X            |                          | X                          |
| Örebro          |                      |                 |                | X              | X                        | X                  | X             |              |                            |                                |                      | X            |                          | X                          |
| Östergötland    |                      | X               | X              |                |                          | X                  | X             |              | X                          |                                |                      |              |                          | X                          |

X= Information channel or vaccination setting implemented

Supporting information:

Highest vaccine uptake after school-based delivery - a county-level evaluation of the implementation strategies for HPV catch-up vaccination in Sweden

Moa Rehn, Ingrid Uhnoo, Sharon Kühlmann-Berenzon, Anders Wallensten, Pär Sparén, Eva Netterlid
